# Supplementary material
Source: Research Square preprint supplement (doi:10.21203/rs.3.rs-9572879/v1)
Supplement: Supplementary file 1 [file 513ea344837f731afe24cc23.docx]

**Supplementary Table S1. Factor Loadings and 95% Confidence Intervals by Gender (Male and Female)**

|  | **Parameter** | | **Estimate** | **LLCI** | **ULCI** | **P** |
| --- | --- | --- | --- | --- | --- | --- |
| MALE | IADQ3 | Preoccupation | 0.716 | 0.653 | 0.771 | <0.001 |
| IADQ2 | Preoccupation | 0.816 | 0.755 | 0.866 | 0.001 |
| IADQ1 | Preoccupation | 0.708 | 0.639 | 0.766 | 0.001 |
| IADQ6 | Failure to Adapt | 0.793 | 0.733 | 0.843 | 0.001 |
| IADQ5 | Failure to Adapt | 0.745 | 0.678 | 0.801 | 0.001 |
| IADQ4 | Failure to Adapt | 0.727 | 0.662 | 0.78 | 0.001 |
| FEMALE | IADQ3 | Preoccupation | 0.743 | 0.695 | 0.786 | 0.001 |
| IADQ2 | Preoccupation | 0.846 | 0.802 | 0.88 | 0.001 |
| IADQ1 | Preoccupation | 0.759 | 0.705 | 0.804 | 0.001 |
| IADQ6 | Failure to Adapt | 0.84 | 0.793 | 0.877 | 0.001 |
| IADQ5 | Failure to Adapt | 0.826 | 0.779 | 0.861 | 0.001 |
| IADQ4 | Failure to Adapt | 0.791 | 0.744 | 0.831 | 0.001 |

Note. IADQ = International Adjustment Disorder Questionnaire; LLCI = Lower Limit of the Confidence Interval; ULCI = Upper Limit of the Confidence Interval.

**Supplementary Table S2. Descriptive Statistics, Inter-Item Correlations, Corrected Item–Total Correlations, and Cronbach’s Alpha if Item Deleted (Diagonal Entries) for the Overall IADQ Score**

|  | **Mean** | **SD** | **IADQ1** | **IADQ2** | **IADQ3** | **IADQ4** | **IADQ5** | **IADQ6** | **CITC** |
| --- | --- | --- | --- | --- | --- | --- | --- | --- | --- |
| **IADQ1** | 1.81 | 1.19 | 1 |  |  |  |  |  | .476 |
| **IADQ2** | 1.89 | 1.25 | .646 | 1 |  |  |  |  | .579 |
| **IADQ3** | 2.05 | 1.27 | .545 | .606 | 1 |  |  |  | .472 |
| **IADQ4** | 1.59 | 1.23 | .488 | .584 | .555 | 1 |  |  | .507 |
| **IADQ5** | 1.69 | 1.24 | .490 | .545 | .537 | .610 | 1 |  | .538 |
| **IADQ6** | 1.79 | 1.28 | .538 | .615 | .518 | .607 | .670 | 1 | .568 |

Note. IADQ = International Adjustment Disorder Questionnaire; SD = Standard Deviation; CITC = Corrected Item Total Correlation

***Supplementary Table S3.* Descriptive Statistics, Inter-Item Correlations, Corrected Item–Total Correlations, and Cronbach’s Alpha if Item Deleted (Diagonal Entries) for the Preoccupation and Failure to Adapt Subscales of the IADQ**

| **Preoccupation** | **Mean** | **SD** | **IADQ1** | **IADQ2** | **IADQ3** | **CITC** |
| --- | --- | --- | --- | --- | --- | --- |
| **IADQ1** | 1.81 | 1.19 | 1 |  |  | .664 |
| **IADQ2** | 1.89 | 1.25 | .646 | 1 |  | .711 |
| **IADQ3** | 2.05 | 1.27 | .545 | .606 | 1 | .635 |
| **Failure to Adapt** | **Mean** | **SD** | **IADQ4** | **IADQ5** | **IADQ6** | **CITC** |
| **IADQ4** | 1.59 | 1.23 | 1 |  |  | .666 |
| **IADQ5** | 1.69 | 1.24 | .610 | 1 |  | .715 |
| **IADQ6** | 1.79 | 1.28 | .607 | .670 | 1 | .712 |

Note. IADQ = International Adjustment Disorder Questionnaire; SD = Standard Deviation; CITC = Corrected Item Total Correlation

**Supplementary Table S4. Frequency Distribution of Number of Psychosocial Stressors Reported by Participants om IADQ Checklist)**

|  | Frequency | Percentage |
| --- | --- | --- |
| One | 527 | 49.3 |
| Two | 225 | 21.0 |
| Three | 142 | 13.3 |
| Four | 81 | 7.6 |
| Five | 39 | 3.6 |
| Six | 30 | 2.8 |
| Seven | 11 | 1.0 |
| Eight | 10 | 0.9 |
| Nine | 4 | 0.4 |
| Total | 1069 | 100.0 |

**Supplementary Table S5. Distribution of Psychosocial Stressors Based on the IADQ Psychosocial Stressor Checklist**

|  |  |
| --- | --- |
| Financial problems | 36.3% (n = 388) |
| Work-related problems | 30.2% (n = 323) |
| Educational problems | 42.5% (n = 454) |
| Housing problems | 12.1% (n = 129) |
| Relationship problems | 29.3% (n = 313) |
| My own health problems | 24.4% (n = 261) |
| A loved one’s health problems | 12.8% (n = 137) |
| Caregiving problems | 18.3% (n = 196) |
| Some other problem not mentioned above. | 8.8% (n = 94) |
